# Supplementary material for: Sulfur-doping effects on oxygen vacancy formation in LaBO3 (B = Fe, Co, and Ni) perovskites
Source: Royal Society of Chemistry journal article supplement (doi:10.1039/d4cp03834g), 2024-12-11
Supplement: d4cp03834g1.pdf [file d4cp03834g1.pdf]

## Supplementary Information for

# Sulfur-doping effects on the oxygen vacancy formation of $\text{LaBO}_3$ (B= Fe, Co, and Ni) perovskites

Ting Jia<sup>a\*</sup>, Yinuo Hao<sup>a</sup>, Hua Hao<sup>a†</sup>

<sup>a</sup> School of Physics, Hangzhou Normal University, Hangzhou, Zhejiang 311121, China

## Defect formation energy

The defect formation energy of one S substitution for O in our  $2 \times 2 \times 2$   $\text{LaBO}_3$  supercells can be described by

$$E_f(F_O) = 8E_{tot}(\text{LaBO}_{2.875}\text{S}_{0.125}) - 8E_{tot}(\text{LaBO}_3) + \mu_O - \mu_S.$$

The  $E_{tot}(\text{LaBO}_{2.875}\text{S}_{0.125})$  and  $8E_{tot}(\text{LaBO}_3)$  are the total energy of defect  $\text{LaBO}_{2.875}\text{S}_{0.125}$  and pristine  $\text{LaBO}_3$  systems, while  $\mu_O$  and  $\mu_S$  are the chemical potential of oxygen and sulfur atoms. Therefore, the  $E_f(F_O)$  depends on the two independent variables of  $\mu_O$  and  $\mu_S$ .

The O-rich and S-rich limit of  $\mu_O(\text{rich})$  and  $\mu_S(\text{rich})$  were calculated from the corresponding elemental solid of  $\text{O}_2$  and  $\text{S}_8$  molecules, resulting in the values of -4.247 eV and -4.126 eV, respectively. On the opposite, we considered the formation of  $\text{La}_2\text{B}_2\text{O}_5$  in the extreme O-poor condition, and the condition of equilibrium between  $\text{LaS}_2$  and  $\text{LaS}$  in the extreme S-poor condition, where the  $\mu_S(\text{poor})$  and  $\mu_O(\text{poor})$  were estimated from

$$\mu_S = E_{tot}(\text{LaS}_2) - E_{tot}(\text{LaS}) = -5.405 \text{ eV},$$

$$\mu_O = 2E_{tot}(\text{LaBO}_3) - E_{tot}(\text{La}_2\text{B}_2\text{O}_5).$$

The  $\mu_O(\text{poor})$  for  $\text{LaBO}_3$  were shown in Tables S1, with the correspond defect formation energy  $E_f(F_O)$  at O-poor/S-rich and O-rich/S-poor cases. The values of  $E_f(F_O)$  at O-poor/S-rich case are

---

\* Author to whom correspondence should be addressed. tjia@hznu.edu.cn

† Author to whom correspondence should be addressed. hhao@hznu.edu.cn

lower than O-rich/S-poor cases. It is reasonable that S substitution for O is easier at O-poor/S-rich conditions.

**Table S1:** The total energies (eV/f.u.) of related compounds, and the calculated  $\mu_{\text{O}}(\text{poor})$  and defect formation energy  $E_f(F_{\text{O}})$  at O-poor/S-rich and O-rich/S-poor cases for  $\text{LaBO}_3$ .

| B  | $\text{LaBO}_{2.875}\text{S}_{0.125}$ | $\text{LaBO}_3$ | $\text{La}_2\text{B}_2\text{O}_5$ | $\mu_{\text{O}}(\text{poor})$<br>(eV) | $E_f(F_{\text{O}})$ (O-poor/S-rich, eV) | $E_f(F_{\text{O}})$ (O-rich/S-poor, eV) |
|----|---------------------------------------|-----------------|-----------------------------------|---------------------------------------|-----------------------------------------|-----------------------------------------|
| Fe | -37.693                               | -38.276         | -68.716                           | -7.837                                | 0.900                                   | 5.821                                   |
| Co | -35.179                               | -35.647         | -65.433                           | -5.860                                | 1.980                                   | 4.873                                   |
| Ni | -32.964                               | -33.490         | -61.024                           | -5.957                                | 2.380                                   | 5.371                                   |

**Table S2.** The distances of B-O and O-B in B-O-B chains to create  $V_O$ , and the formation energies  $E_f$  (eV), related electrostatic  $E_{\text{bond}}$  (eV) and structural relaxation  $E_{\text{relax}}$  (eV) terms for  $\text{LaBO}_{3-\delta}$ .

| B     | <i>Distances of B-O , O-B (<math>\text{\AA}</math>)</i> | $E_f$ (eV) | $E_{\text{bond}}$ (eV) | $E_{\text{relax}}$ (eV) |
|-------|---------------------------------------------------------|------------|------------------------|-------------------------|
| Fe    | 2.042, 2.029                                            | 4.227      | 4.707                  | -0.480                  |
|       | 2.031, 2.031                                            | 4.232      | 4.755                  | -0.523                  |
| Co-LS | 1.943, 1.943                                            | 3.324      | 4.140                  | -0.816                  |
| Co-HS | 2.084, 1.926                                            | 2.463      | 3.127                  | -0.664                  |
|       | 2.056, 2.054                                            | 2.261      | 3.495                  | -1.234                  |
| Co-IS | 1.959, 1.959                                            | 1.822      | 3.122                  | -1.300                  |
|       | 1.999, 1.999                                            | 1.883      | 2.910                  | -1.027                  |
| Ni    | 1.956, 1.955                                            | 1.539      | 2.643                  | -1.104                  |

**Table S3.** The octahedra, the distances of B-O and O-B in B-O-B chains to create  $V_O$ , and the formation energies  $E_f$  (eV), related electrostatic  $E_{\text{bond}}$  (eV) and structural relaxation  $E_{\text{relax}}$  (eV) terms for  $\text{LaFeO}_{2.875-\delta}\text{S}_{0.125}$ .

| Octahedra           | <i>Distances of Fe-O, O-Fe (<math>\text{\AA}</math>)</i> | $E_f$ (eV) | $E_{\text{bond}}$ (eV) | $E_{\text{relax}}$ (eV) |
|---------------------|----------------------------------------------------------|------------|------------------------|-------------------------|
| Fe1O <sub>5</sub> S | 2.026, 2.089                                             | 3.282      | 4.330                  | -1.048                  |
|                     | 2.055, 2.061                                             | 3.741      | 4.472                  | -0.731                  |
|                     | 1.919, 1.924                                             | 3.856      | 4.389                  | -0.633                  |
| Fe2O <sub>6</sub>   | 2.084, 2.106                                             | 3.813      | 4.745                  | -0.932                  |
|                     | 2.032, 2.041                                             | 4.051      | 4.669                  | -0.618                  |
| Fe3O <sub>6</sub>   | 2.075, 2.088                                             | 4.201      | 4.755                  | -0.554                  |
|                     | 2.045, 2.051                                             | 4.253      | 4.731                  | -0.478                  |

**Table S4.** The octahedra, the distances of B-O and O-B in B-O-B chains to create  $V_O$ , and the formation energies  $E_f$  (eV), related electrostatic  $E_{\text{bond}}$  (eV) and structural relaxation  $E_{\text{relax}}$  (eV) terms for LS  $\text{LaCoO}_{2.875-\delta}\text{S}_{0.125}$ .

| Octahedra           | <i>Distances of Co-O, O-Co (<math>\text{\AA}</math>)</i> | $E_f$ (eV) | $E_{\text{bond}}$ (eV) | $E_{\text{relax}}$ (eV) |
|---------------------|----------------------------------------------------------|------------|------------------------|-------------------------|
| Co1O <sub>5</sub> S | 1.981, 1.981                                             | 2.515      | 3.769                  | -1.254                  |
|                     | 1.941, 1.995                                             | 2.398      | 4.023                  | -1.625                  |
|                     | 1.878, 1.879                                             | 2.755      | 3.722                  | -0.968                  |
| Co2O <sub>6</sub>   | 1.990, 1.991                                             | 2.905      | 4.034                  | -1.129                  |
|                     | 1.959, 1.960                                             | 3.036      | 3.995                  | -0.959                  |
| Co3O <sub>6</sub>   | 1.990, 1.991                                             | 3.366      | 4.336                  | -0.970                  |
|                     | 1.935, 1.936                                             | 3.589      | 3.920                  | -0.531                  |

**Table S5.** The octahedra, the distances of B-O and O-B in B-O-B chains to create  $V_O$ , and the formation energies  $E_f$  (eV), related electrostatic  $E_{\text{bond}}$  (eV) and structural relaxation  $E_{\text{relax}}$  (eV) terms for HS  $\text{LaCoO}_{2.875-\delta}\text{S}_{0.125}$ .

| Octahedra           | <i>Distances of Co-O, O-Co (<math>\text{\AA}</math>)</i> | $E_f$ (eV) | $E_{\text{bond}}$ (eV) | $E_{\text{relax}}$ (eV) |
|---------------------|----------------------------------------------------------|------------|------------------------|-------------------------|
| Co1O <sub>5</sub> S | 1.972, 2.059                                             | 1.964      | 3.224                  | -1.260                  |
|                     | 1.889, 2.170                                             | 1.607      | 3.058                  | -1.451                  |
|                     | 1.922, 1.937                                             | 1.761      | 3.756                  | -1.995                  |
| Co2O <sub>6</sub>   | 2.078, 2.085                                             | 1.918      | 3.354                  | -1.436                  |
|                     | 1.884, 2.107                                             | 1.993      | 3.205                  | -1.212                  |
| Co3O <sub>6</sub>   | 2.101, 2.107                                             | 2.165      | 3.490                  | -1.325                  |
|                     | 2.036, 2.044                                             | 2.211      | 3.238                  | -1.027                  |

**Table S6.** The octahedra, the distances of B-O and O-B in B-O-B chains to create  $V_O$ , and the formation energies  $E_f$  (eV), related electrostatic  $E_{\text{bond}}$  (eV) and structural relaxation  $E_{\text{relax}}$  (eV) terms for IS  $\text{LaCoO}_{2.875-\delta}\text{S}_{0.125}$ .

| Octahedra           | <i>Distances of Co-O, O-Co (<math>\text{\AA}</math>)</i> | $E_f$ (eV) | $E_{\text{bond}}$ (eV) | $E_{\text{relax}}$ (eV) |
|---------------------|----------------------------------------------------------|------------|------------------------|-------------------------|
| Co1O <sub>5</sub> S | 2.046, 1.957                                             | 1.823      | 3.191                  | -1.368                  |
|                     | 2.010, 1.943                                             | 1.583      | 2.936                  | -1.353                  |
|                     | 1.928, 1.929                                             | 1.885      | 3.019                  | -1.134                  |
| Co2O <sub>6</sub>   | 2.024, 2.022                                             | 2.097      | 3.567                  | -1.470                  |
|                     | 2.006, 1.920                                             | 2.138      | 3.655                  | -1.517                  |
| Co3O <sub>6</sub>   | 2.055, 2.042                                             | 2.679      | 3.629                  | -0.950                  |
|                     | 1.996, 1.985                                             | 2.348      | 3.157                  | -0.809                  |

**Table S7.** The octahedra, the distances of B-O and O-B in B-O-B chains to create  $V_O$ , and the formation energies  $E_f$  (eV), related electrostatic  $E_{\text{bond}}$  (eV) and structural relaxation  $E_{\text{relax}}$  (eV) terms for  $\text{LaNiO}_{2.875-\delta}\text{S}_{0.125}$ .

| Octahedra           | <i>Distances of Ni-O, O-Ni (<math>\text{Å}</math>)</i> | $E_f$ (eV) | $E_{\text{bond}}$ (eV) | $E_{\text{relax}}$ (eV) |
|---------------------|--------------------------------------------------------|------------|------------------------|-------------------------|
| Ni1O <sub>5</sub> S | 1.951, 2.046                                           | 0.939      | 2.299                  | -1.360                  |
|                     | 1.932, 2.002                                           | 0.826      | 2.200                  | -1.374                  |
|                     | 1.876, 1.876                                           | 1.011      | 2.151                  | -1.140                  |
| Ni2O <sub>6</sub>   | 1.980, 1.991                                           | 1.269      | 2.739                  | -1.470                  |
|                     | 1.964, 1.979                                           | 1.479      | 2.764                  | -1.285                  |
| Ni3O <sub>6</sub>   | 1.998, 1.998                                           | 1.835      | 3.071                  | -1.236                  |
|                     | 1.949, 1.948                                           | 1.577      | 2.700                  | -1.123                  |
